# Supplementary material
Source: PubMed Central journal article supplement (PMC7515654)
Supplement: NIHMS1625624-supplement-Supplementary_Material_1.pdf [file NIHMS1625624-supplement-Supplementary_Material_1.pdf]

Supplementary Table 1. Sequences of primers used for gRNA cloning and PCR screening.

| Name    | Sequence                    |
|---------|-----------------------------|
| F1      | AACATGTGCACACAGGGAGA        |
| R1      | ATGGGCAAAGTTTCAGTTGG        |
| F1.2    | ACTGAGGAATGCTGGGAGAA        |
| R1.2    | ATGGGCAAAGTTTCAGTTGG        |
| gRNA1-F | CACCGTTCGAGGTCTTTAGGCAGCT   |
| gRNA1-R | AAACAGCTGCCTAAAGACCTCGAAC   |
| gRNA2-F | CACCGGCCAGGTACAGTGTCAGTGC   |
| gRNA2-R | AAACGCACTGACACTGTACCTGGCC   |
| F2      | TTCTTACGAGACGAGAGGGTTT      |
| R2      | CATATACCTCCACGCATATATACATTA |
| gRNA3-F | CACCGAGAGGCCATGAATGCGAGCA   |
| gRNA3-R | AAACTGCTCGCATTTCATGGCCTCTC  |
| gRNA4-F | CACCGGAGAGCACTGCCCAGTGGGT   |
| gRNA4-R | AAACACCCACTGGGCAGTGCTCTCC   |

Supplementary Table 2. Expected sizes for PCR products in surveyor assay.

| Primers | Gene         | gRNA | Full length, bp | Fragments, bp |
|---------|--------------|------|-----------------|---------------|
| F1 + R1 | <i>Psen1</i> | sgR1 | 764             | 764, 315, 450 |
| F1 + R1 | <i>Psen1</i> | sgR2 | 764             | 764, 584, 180 |
| F2 + R2 | <i>Psen2</i> | sgR5 | 598             | 598, 347, 251 |
| F2 + R2 | <i>Psen2</i> | sgR6 | 598             | 598, 490, 108 |

Supplementary Table 3. Expected sizes for PCR products in PCR screening.

| Primers     | Gene         | gRNA        | Full length, bp | Cut length, bp | Cut out piece, bp |
|-------------|--------------|-------------|-----------------|----------------|-------------------|
| F1 + R1     | <i>Psen1</i> | sgR1 + sgR2 | 764             | 495            | 269               |
| F1.2 + R1.2 | <i>Psen1</i> | sgR1 + sgR2 | 660             | 391            | 269               |
| F2 + R2     | <i>Psen2</i> | sgR3 + sgR4 | 598             | 457            | 141               |

Supplementary Table 4. Primers for qPCR analysis.

| Primer name | Sequence                |
|-------------|-------------------------|
| Psen1-F     | GGTGGCTGTTTTATGTCCCAA   |
| Psen1-R     | CAACCACACCATTGTTGAGGA   |
| Psen2-F     | GAAGACTCCTACGACAGTTTTGG |
| Psen2-R     | CACCAGGACGCTGTAGAAGAT   |
| Aph1a-F     | AGAAGCACAGTCGGTATTCA    |
| Aph1a-R     | TGCGATGTGTAGTAGACGAAGTA |
| Aph1b-F     | TGGTCGTCATAATGCTGCACG   |
| Aph1b-R     | CACCAGATGCGTCAGGAGA     |
| Ncstn-F     | TCCGTGGTACTGGCAGGATT    |
| Ncstn-R     | CCCCTGTATCCCCACTAATTGA  |
| Psenen-F    | ATGAACTTGGAGCGGGTATCC   |
| Psenen-R    | CGAGGAACGCCTCTCTGAAG    |
| App-F       | ACCCAGATCGCCATGTTC      |
| App-R       | CCCCTTTCCATTCTGCACATTC  |
| Bace1-F     | GGAACCCATCTCGGCATCC     |
| Bace1-R     | TCCGATTCCTCGTCGGTCTC    |
| Adam10-F    | ATGGTGTGCGGACAGTGTTA    |
| Adam10-R    | GTTTGGCACGCTGGTGTTTTT   |
| Gapdh-F     | TGGCAAAGTGGAGATTGTTGCC  |
| Gapdh-R     | AAGATGGTGATGGGCTTCCCG   |
