# Supplementary material
Source: PubMed Central journal article supplement (PMC7515654)
Supplement: NIHMS1625624-supplement-Supplementary_Material_2.pdf [file NIHMS1625624-supplement-Supplementary_Material_2.pdf]

Supplementary Fig. S1

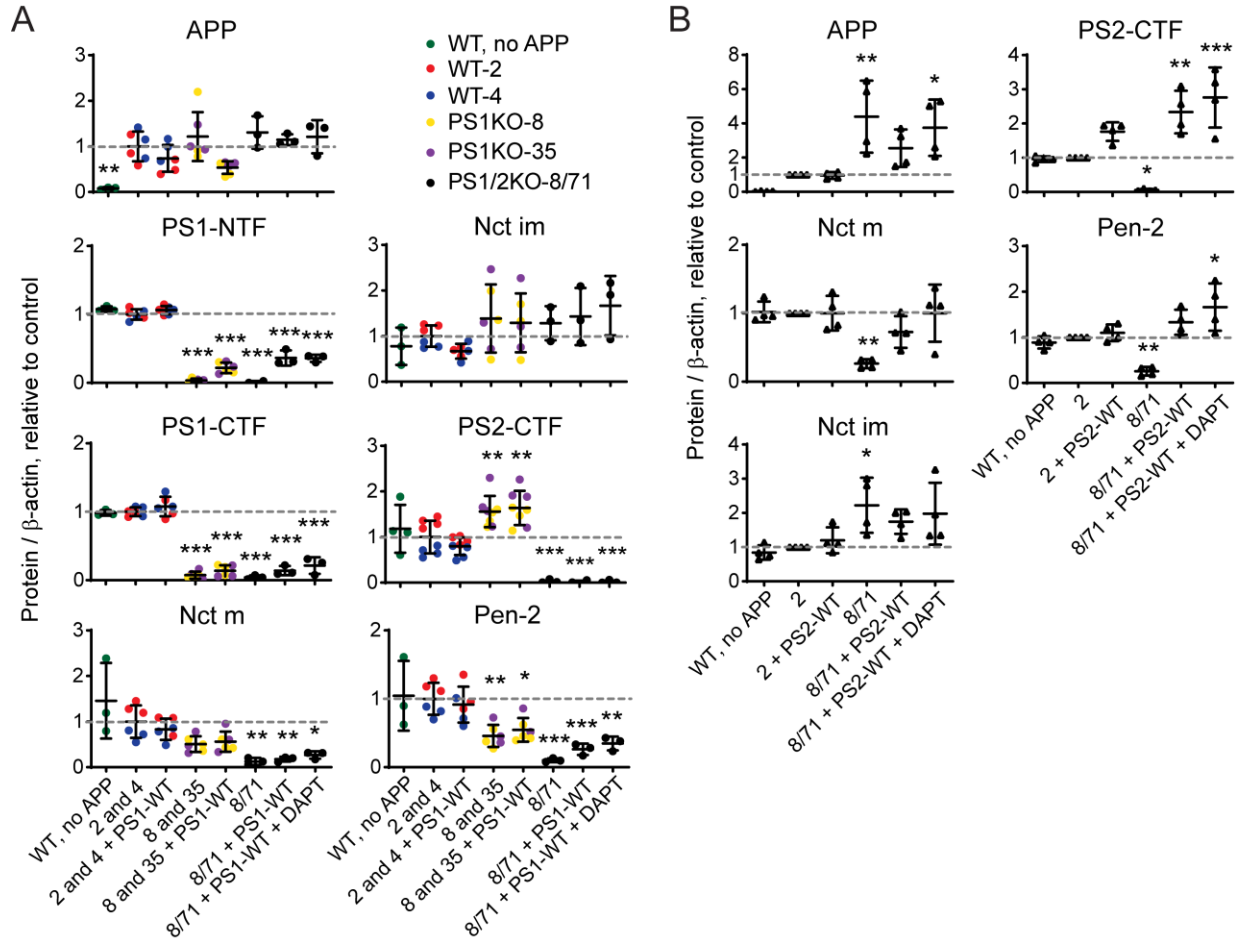

Overexpression of wild type *PSEN1* or *PSEN2* in the double *Psen1/Psen2* knock-out cells. (A, B) Quantification of  $\gamma$ -secretase subunits and APP processing by western blotting based on Fig. 3C and 4A. Values shown are mean  $\pm$  SD of  $n = 3$  independent experiments with one technical replicate each. \*  $P < .05$ , \*\*  $P < .01$ , \*\*\*  $P < .001$ , one-way ANOVA with Dunnett's post-hoc test against the control condition (2 and 4 in A, 2 in B).

Supplementary Fig. S2

A

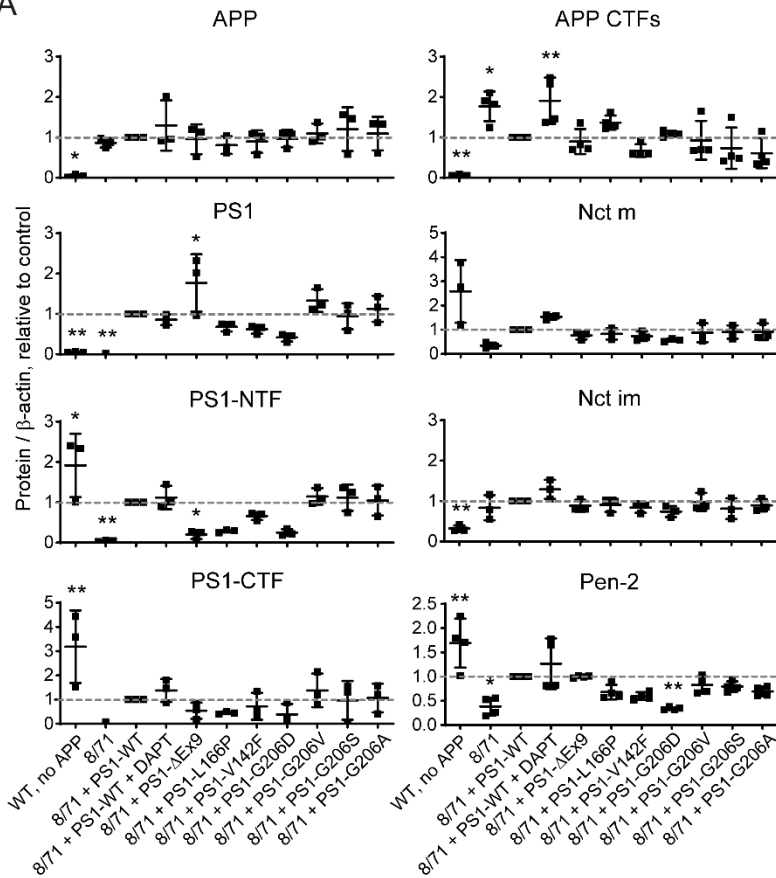

B

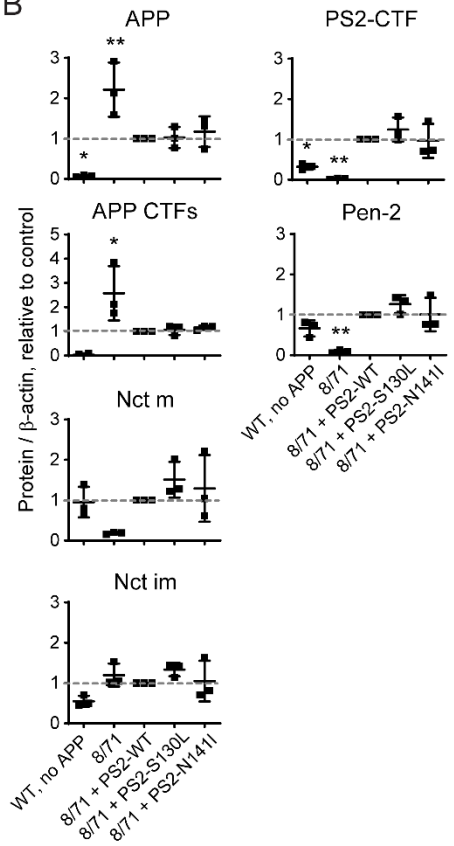

Overexpression of mutant *PSEN1* or *PSEN2* in the double *Psen1/Psen2* knock-out cells. (A, B) Quantification of  $\gamma$ -secretase subunits and APP processing by western blotting based on Fig. 5A and 6A. Values shown are mean  $\pm$  SD of  $n = 3$  independent experiments with one technical replicate each. \*  $P < .05$ , \*\*  $P < .01$ , one-way ANOVA with Dunnett's post-hoc test against the control condition (8/71 + PS1-WT in A, 8/71 + PS2-WT in B).
